# Supplementary material for: The draft nuclear genome sequence and predicted mitochondrial proteome of Andalucia godoyi, a protist with the most gene-rich and bacteria-like mitochondrial genome
Source: PubMed Central journal article supplement (PMC7050145; doi:10.1186/s12915-020-0741-6), 2020-03-02

**(A) Pyruvate kinase (348 amino acid positions in alignment)**

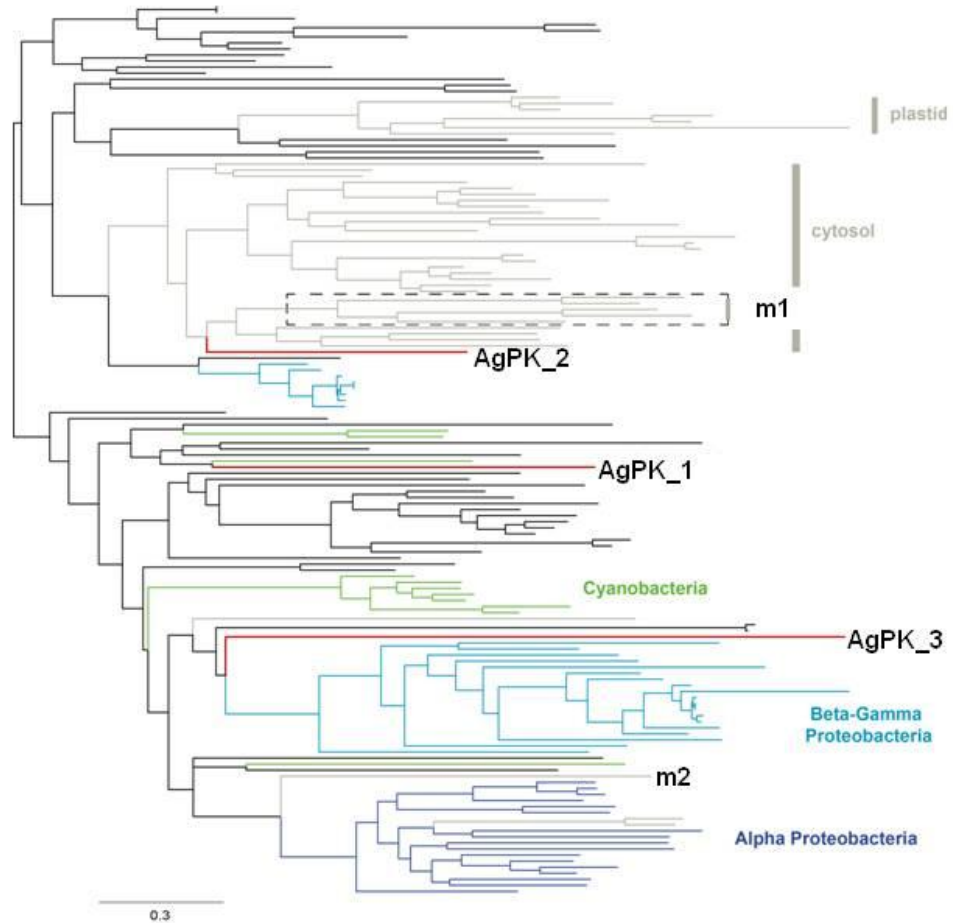

*A. godoyi* encodes three pyruvate kinases: AgPK\_1 (ANDGO\_05259, mitochondrial) ; AgPK\_2 (ANDGO\_08019, cytosolic type); and AgPK\_3 (ANDGO\_06998, bacterial type). Positions of mitochondrion-targeted pyruvate kinases in other studies: m1, Abrahamian et al. [39]; m2, Saito et al. [37].

**(B) RecA (155 amino acid positions in alignment)**

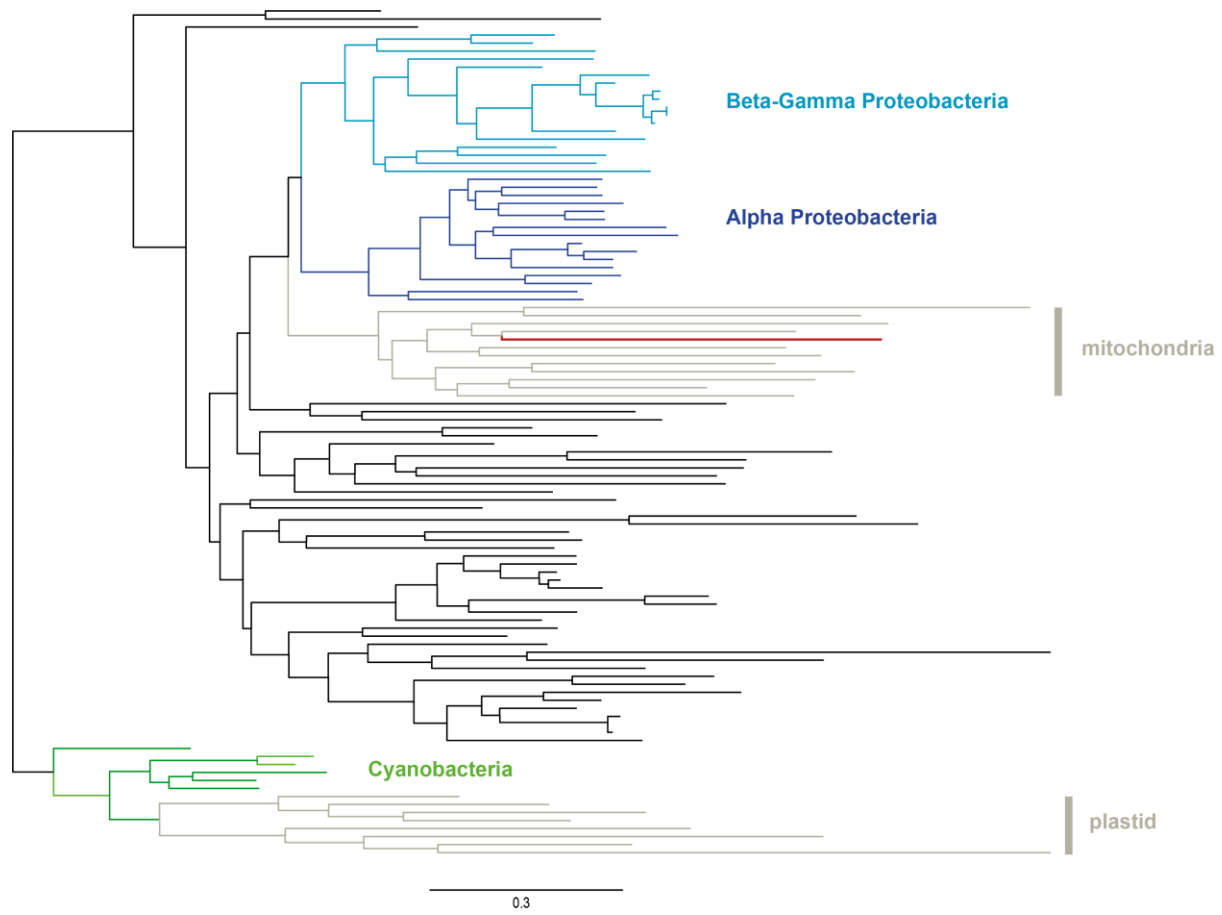

**(C) SmpB (475 amino acid positions in alignment)**

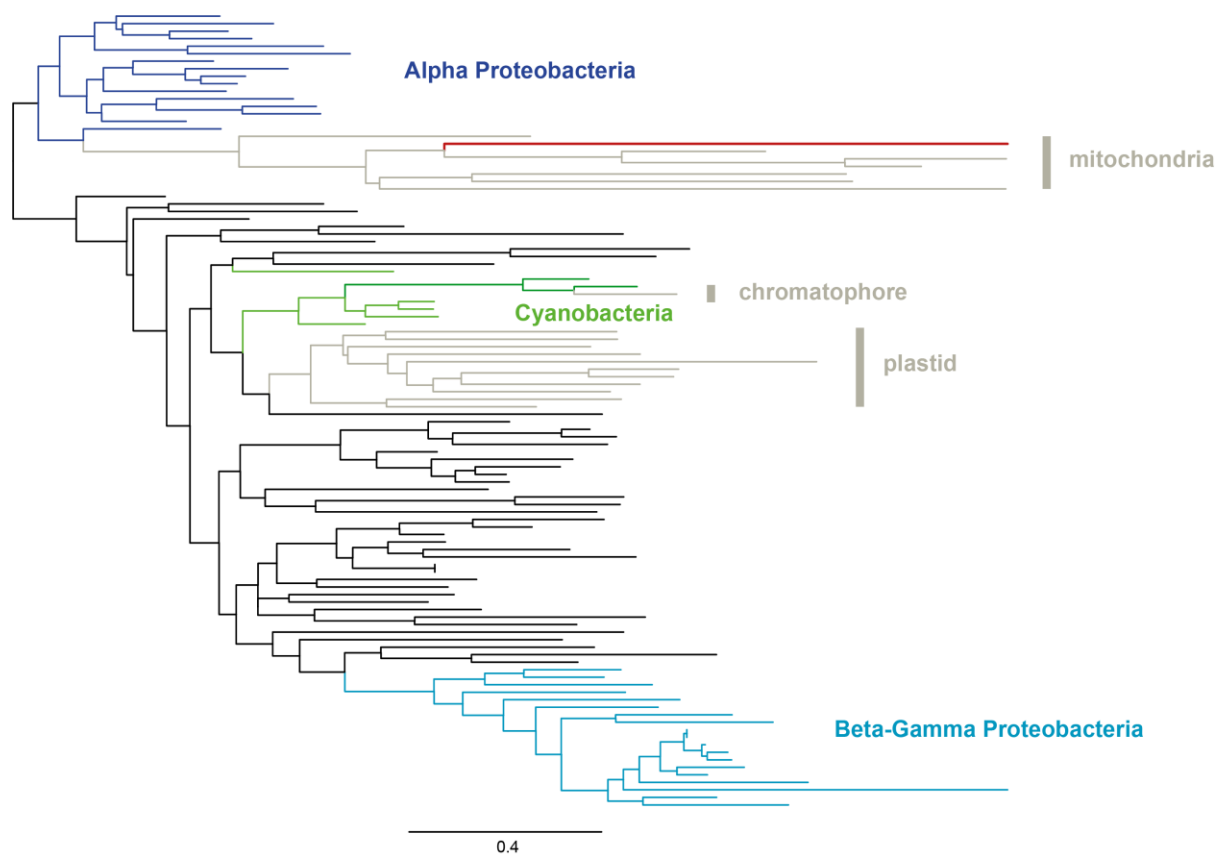

Supplement: 12915_2020_741_MOESM3_ESM.pdf [file 12915_2020_741_MOESM3_ESM.pdf]
