# Supplementary material for: The draft nuclear genome sequence and predicted mitochondrial proteome of Andalucia godoyi, a protist with the most gene-rich and bacteria-like mitochondrial genome
Source: PubMed Central journal article supplement (PMC7050145; doi:10.1186/s12915-020-0741-6), 2020-03-02
Supplement: 12915_2020_741_MOESM5_ESM.pdf [file 12915_2020_741_MOESM5_ESM.pdf]

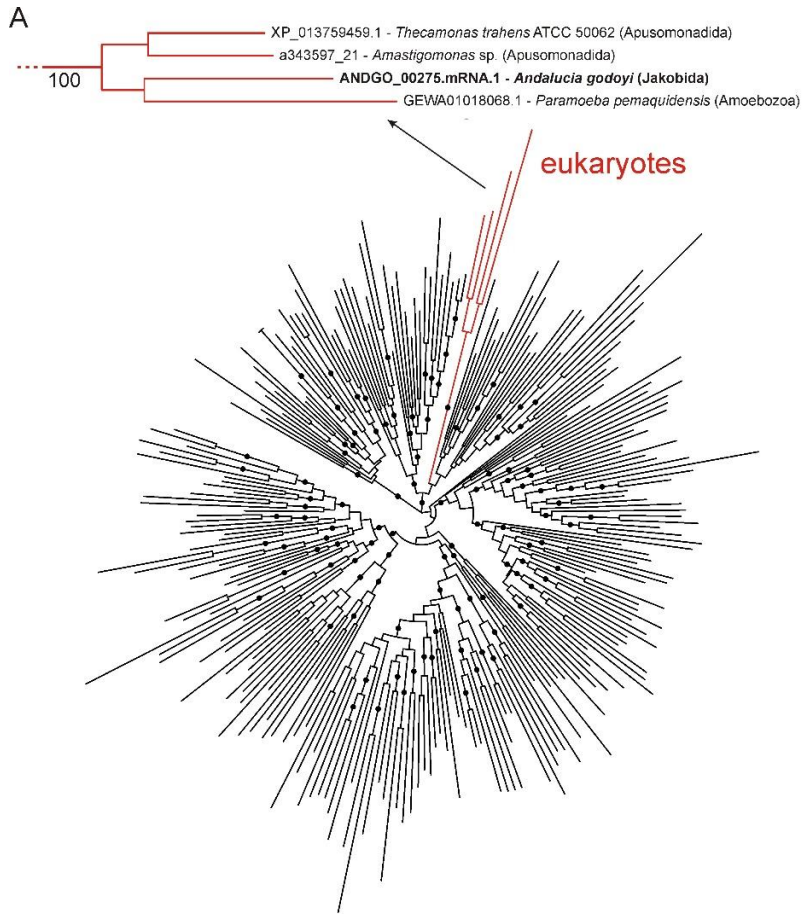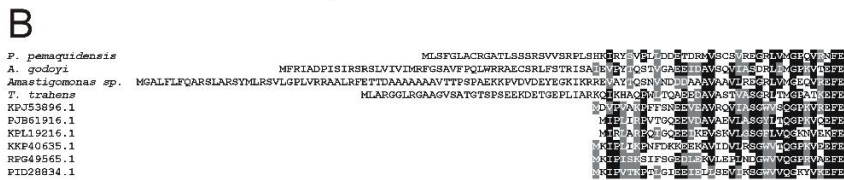

|                                | MitoProt | TargetP | Predotar | PSORT II |
|--------------------------------|----------|---------|----------|----------|
| <i>Paramoeba pemaquidensis</i> | 0.9673   | 0.956   | 0.77     | 60.90%   |
| <i>Andalusia godoyi</i>        | 0.7043   | 0.885   | 0.57     | 65.20%   |
| <i>Amastigomonas</i> sp.       | 0.9993   | 0.974   | 0.52     | 69.60%   |
| <i>Thecamonas trahens</i>      | 0.7165   | 0.526   | 0.57     | 34.80%   |
