# Supplementary material for: The draft nuclear genome sequence and predicted mitochondrial proteome of Andalucia godoyi, a protist with the most gene-rich and bacteria-like mitochondrial genome
Source: PubMed Central journal article supplement (PMC7050145; doi:10.1186/s12915-020-0741-6), 2020-03-02

(A) RFO (365 amino acid positions in alignment)

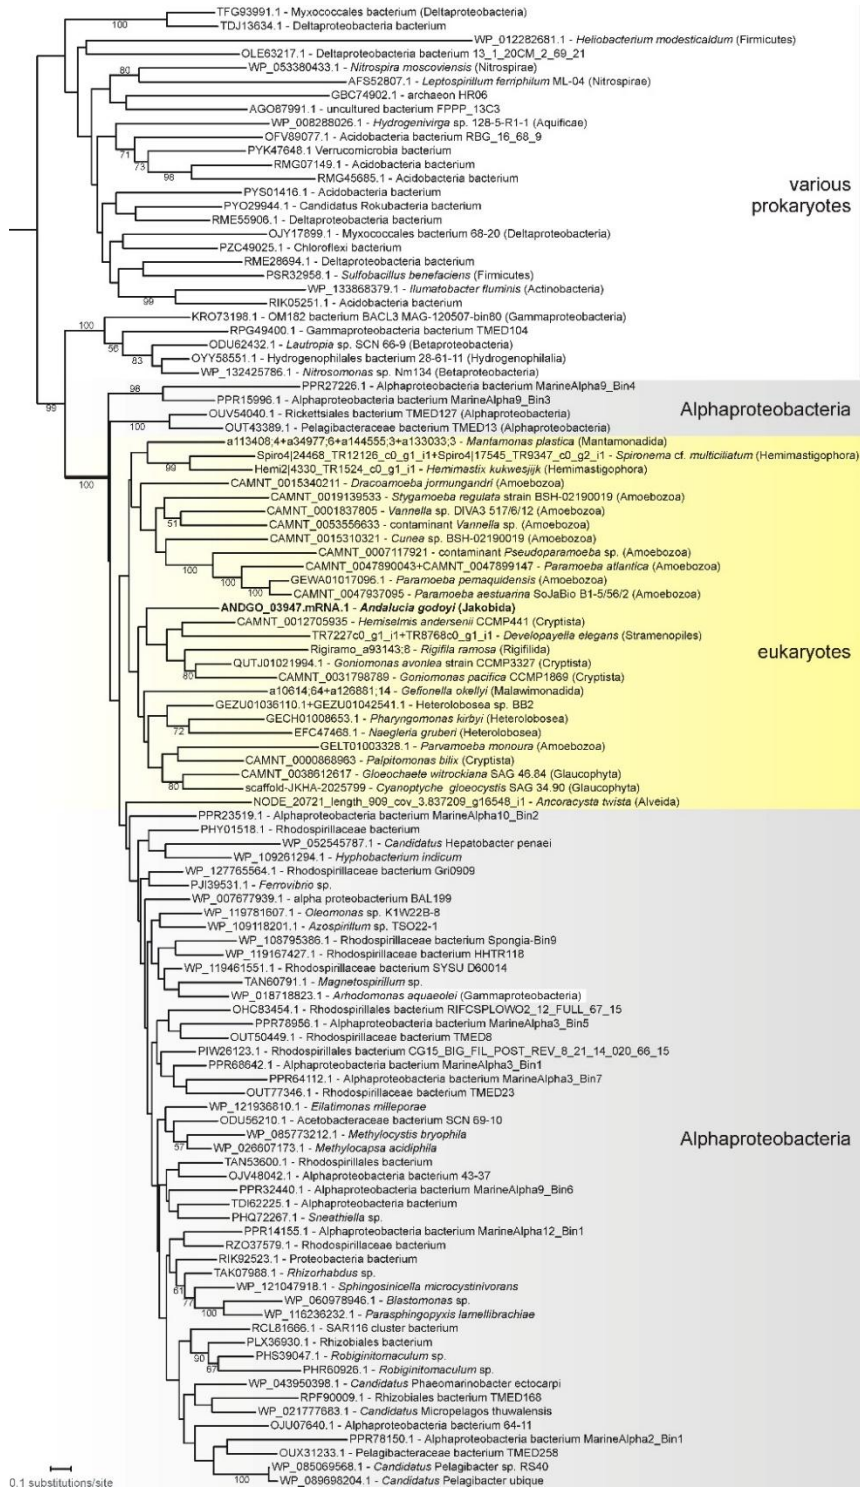

(B) DUF3501 (128 amino acid positions in alignment)

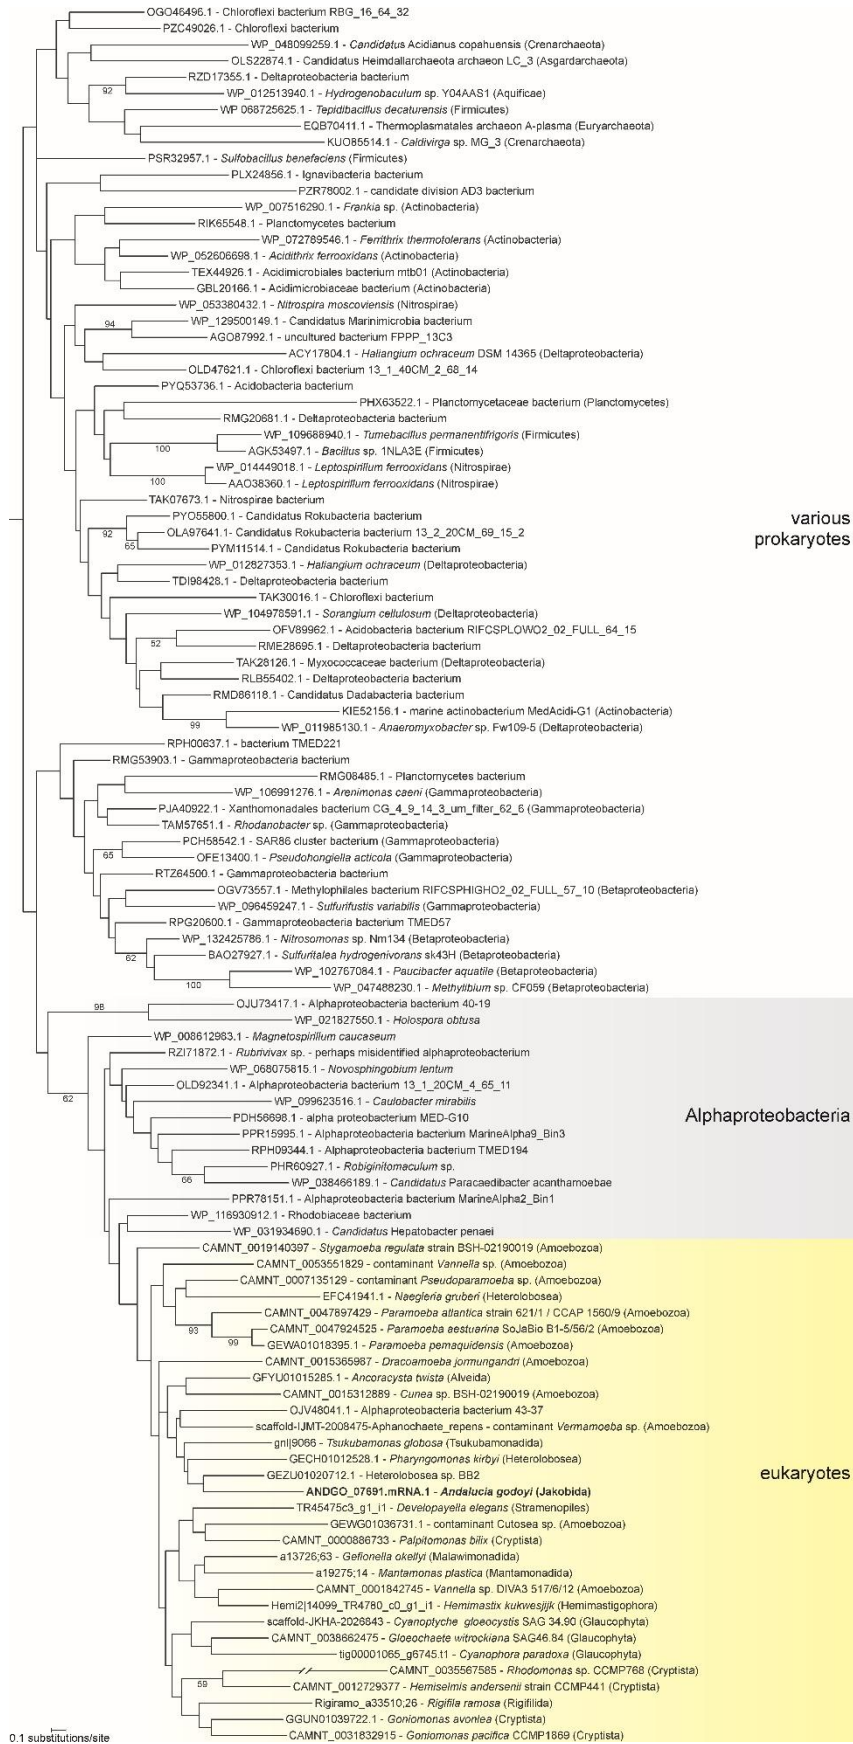

Supplement: 12915_2020_741_MOESM7_ESM.pdf [file 12915_2020_741_MOESM7_ESM.pdf]
